# Supplementary material for: Synthesis, crystal structure and immobilization of a new cobalt(ii) complex with a 2,4,6-tris(2-pyridyl)-1,3,5-triazine ligand on modified magnetic nanoparticles as a catalyst for the oxidation of alkanes
Source: Royal Society of Chemistry journal article supplement (doi:10.1039/c9nj02055a), 2019-01-01
Supplement: c9nj02055a1.pdf [file c9nj02055a1.pdf]

## Synthesis, crystal structure and immobilization of a new cobalt (II) complex with 2,4,6-tris(2-pyridyl)-1,3,5-triazine ligand on modified magnetic nanoparticles as a catalyst for the oxidation of alkanes

Zahra Azarkamanzad,<sup>a</sup> Faezeh Farzaneh,<sup>a</sup> Mahboobeh Maghami<sup>a</sup> and Jim Simpson<sup>b</sup>

### Supporting information:

#### Materials and instrumentation

All materials were of commercial reagent grade and used without further purification. FTIR spectra were recorded on a Bruker Tensor 27 FT-IR spectrometer using KBr pellets over the range of 4,000–400 cm<sup>-1</sup>. Raman spectra were measured on a **NRS-4100** Dispersive Raman spectrometer equipped with 633 nm argon ion laser. Elemental analyses were performed on a Heraeus CHN-O-Rapid elemental analyzer. The amount of cobalt and iron in the Fe<sub>3</sub>O<sub>4</sub>@SiO<sub>2</sub>@APTMS@ [Co(tptz)Cl<sub>2</sub>]. 2H<sub>2</sub>O nanocatalyst was determined by atomic absorption spectroscopy (AAS) with a GBC flame spectrophotometer (0.30% (2988 ppm) Co, 77.64 % Fe). Magnetic susceptibility measurements were carried out using a vibrating sample magnetometer (VSM) (BHV-55, Riken, Japan) in the magnetic field range of -8000 to 8000 Oe at room temperature. TGA/DSC (Thermogravimetric analysis & Differential Scanning Calorimetry) were recorded on a METTLER TOLEDO instrument using 12 mg of [Co(tptz)Cl<sub>2</sub>]. 2H<sub>2</sub>O. The X-ray powder diffraction (XRD) data were recorded on a Siefert XRD 3003 PTS diffractometer, using Cu Kα1 radiation (k = 1.5406 Å). X-ray photoelectron spectroscopy (XPS) measurements were carried out with a Thermo Scientific, ESCALAB 250Xi using an Mg X-ray source. Scanning electron microscopy (SEM) images were taken by KYKY-EM3200-26 KV. Transmission electron microscopy (TEM) images were taken by Zeiss-EM10C-100 KV. Energy Dispersive X-Ray Analysis (EDX) were recorded on a VEGA3 LMU analysis was performed by TESCAN Company. Data oxidation products were analyzed by GC and GC-Mass using Agilent 6890 series with a FID detector, HP-5, 5% phenylmethylsiloxane capillary and Agilent 5973 network, mass selective detector, HP-5 MS 6989 network GC system, respectively.

#### Characterization Fe<sub>3</sub>O<sub>4</sub>, Fe<sub>3</sub>O<sub>4</sub>@SiO<sub>2</sub> and Fe<sub>3</sub>O<sub>4</sub>@SiO<sub>2</sub>@APTMS

##### FT-IR spectra:

Observation of a broad band in the spectrum of Fe<sub>3</sub>O<sub>4</sub> with relatively low intensity centered at 3400 cm<sup>-1</sup> to 1600 cm<sup>-1</sup> should be attributed either to Fe-OH group surface, or stretching and bending vibrations of the adsorbed water (Figure S3a). The stretching vibration of Fe-O also appears at 580 cm<sup>-1</sup>. The band appears at 1050 cm<sup>-1</sup> due to Si-O stretching demonstrates the presence of SiO<sub>2</sub> components (Figure S3b) [1,2]. After functionalizing of silica coated magnetic nanoparticles with APTMS, a new bands appeared at 2858-2922 cm<sup>-1</sup> due to the N-H and C-H stretching vibrations [3].

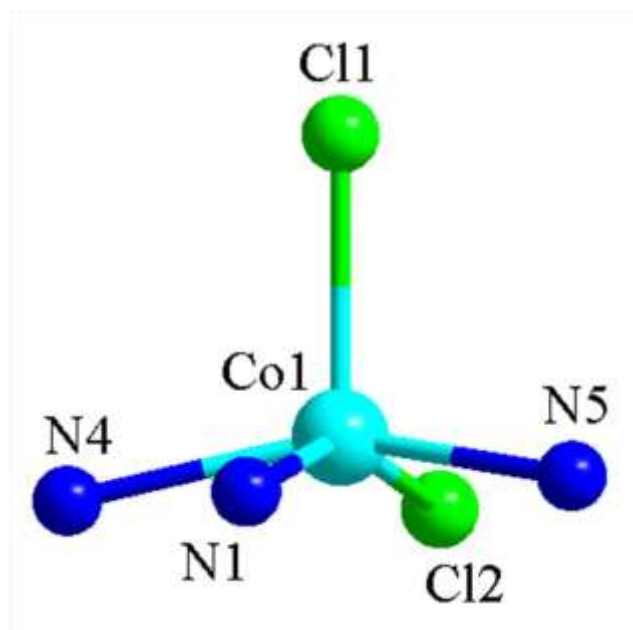

**Figure S1.** The distorted square pyramidal coordination sphere of complex 1.

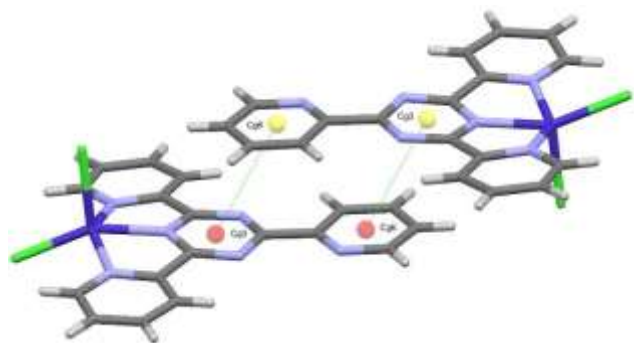

**Figure S2.** Inversion related  $\pi \dots \pi$  stacking interactions between adjacent complex 1 molecules, shown as green dotted lines with ring centroids shown as coloured spheres.

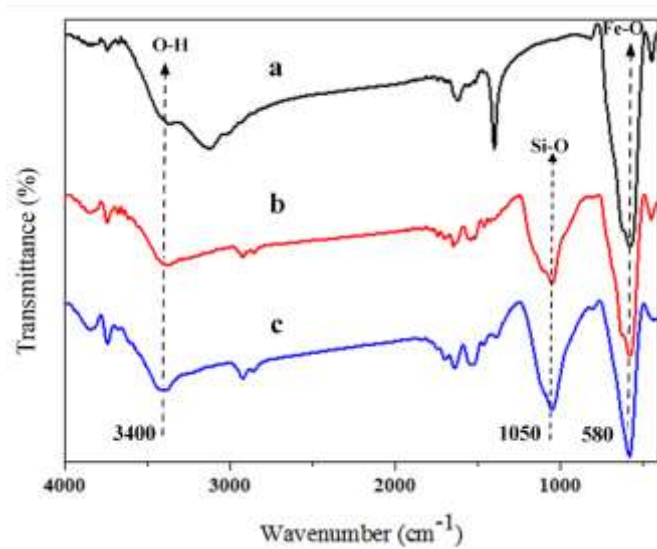

**Figure S3.** The FT-IR spectra of (a)  $\text{Fe}_3\text{O}_4$ , (b)  $\text{Fe}_3\text{O}_4@ \text{SiO}_2$ , (c)  $\text{Fe}_3\text{O}_4@ \text{SiO}_2@ \text{APTMS}$ .

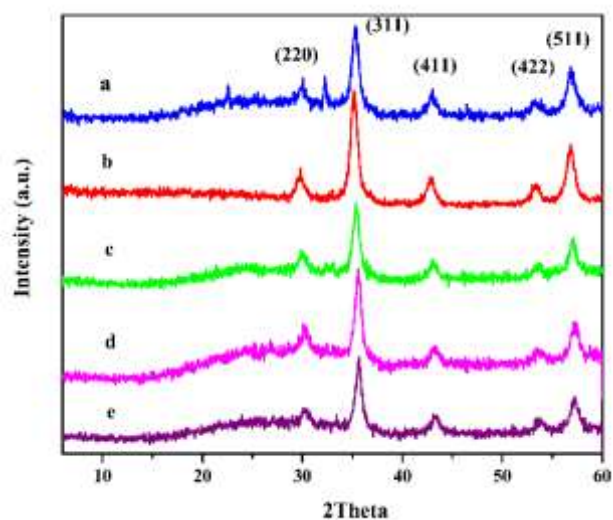

**Figure S4.** XRD pattern for (a)  $\text{Fe}_3\text{O}_4$ , (b)  $\text{Fe}_3\text{O}_4@SiO_2$ , (c)  $\text{Fe}_3\text{O}_4@SiO_2@APTMS$  (d)  $\text{Fe}_3\text{O}_4@SiO_2@APTMS@complex\ 1$  (catalyst B) before using and (e) after using as catalyst.

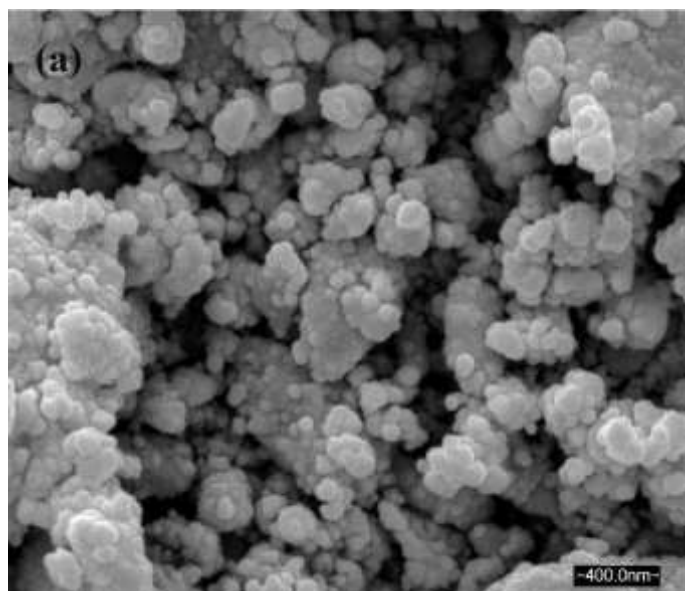

**Figure S5.** Scanning electron microscopy (SEM) images of nanoparticles  $\text{Fe}_3\text{O}_4@SiO_2@APTMS@complex\ 1$  (catalyst B)

**Table S1.** Hydrogen bond distances (Å), angles (°) and  $\pi\cdots\pi$  contacts (Å) for **1**

| D—H...A                    | D—H      | H...A    | D...A or Cg...Cg | $\angle$ D—H...A |
|----------------------------|----------|----------|------------------|------------------|
| O1W—H1W...Cl1 <sup>1</sup> | 0.85(16) | 2.37(16) | 3.164(18)        | 155(15)          |
| O2W—4W...O1W <sup>2</sup>  | 0.86(18) | 2.10(15) | 2.79(2)          | 136(1)           |
| C5—H5...Cl2 <sup>3</sup>   | 0.95     | 2.80     | 3.745(18)        | 172              |
| C9—H9...O2W <sup>4</sup>   | 0.95     | 2.57     | 3.51(2)          | 170              |
| C11—H11...Cl2 <sup>5</sup> | 0.95     | 2.76     | 3.674(17)        | 162              |
| C18—H18...O2W <sup>4</sup> | 0.95     | 2.38     | 3.29(2)          | 161              |
| Cg3...Cg6 <sup>6</sup>     |          |          | 3.794(9)         |                  |

Symmetry operations: 1 = 1+x, y, z; 2 = 2-x, 2-y, 1-z; 3 = 1-x, 1-y, -z; 4 = x, 1+y, z; 5 = -x, 2-y, -z; 6 = 2-x, 3-y, 1-z Cg3 and Cg6 are the centroids of the N1, C1, N2, C13, N3, C7 and N6, C14-C18 rings respectively

Table S2. Comparison the catalytic activity of [Co(tpz)Cl<sub>2</sub>]. 2H<sub>2</sub>O (catalyst A) with some soluble cobalt salts for flourene oxidation

| Entry | Catalyst <sup>a</sup>                                     | Substrate | Conversion (%) | Selectivity (%) | TON |
|-------|-----------------------------------------------------------|-----------|----------------|-----------------|-----|
| 1     | [Co(tpz)Cl <sub>2</sub> ]. 2H <sub>2</sub> O (catalyst A) | Flourene  | 99             | 100             | 10  |
| 2     | Co(OAC) <sub>2</sub> .4H <sub>2</sub> O                   | Flourene  | 53             | 76              | 3   |
| 3     | Co(acac) <sub>2</sub>                                     | Flourene  | 47             | 73              | 2   |

<sup>a</sup> Reaction conditions: catalyst, (50mg), substrate (1mmol), TBHP (1.2 mmol), solvent (acetonitrile, 5 mL, reflux at 80 °C), time (10 h).

## GC-Mass analysis:

### 1. Fluorene

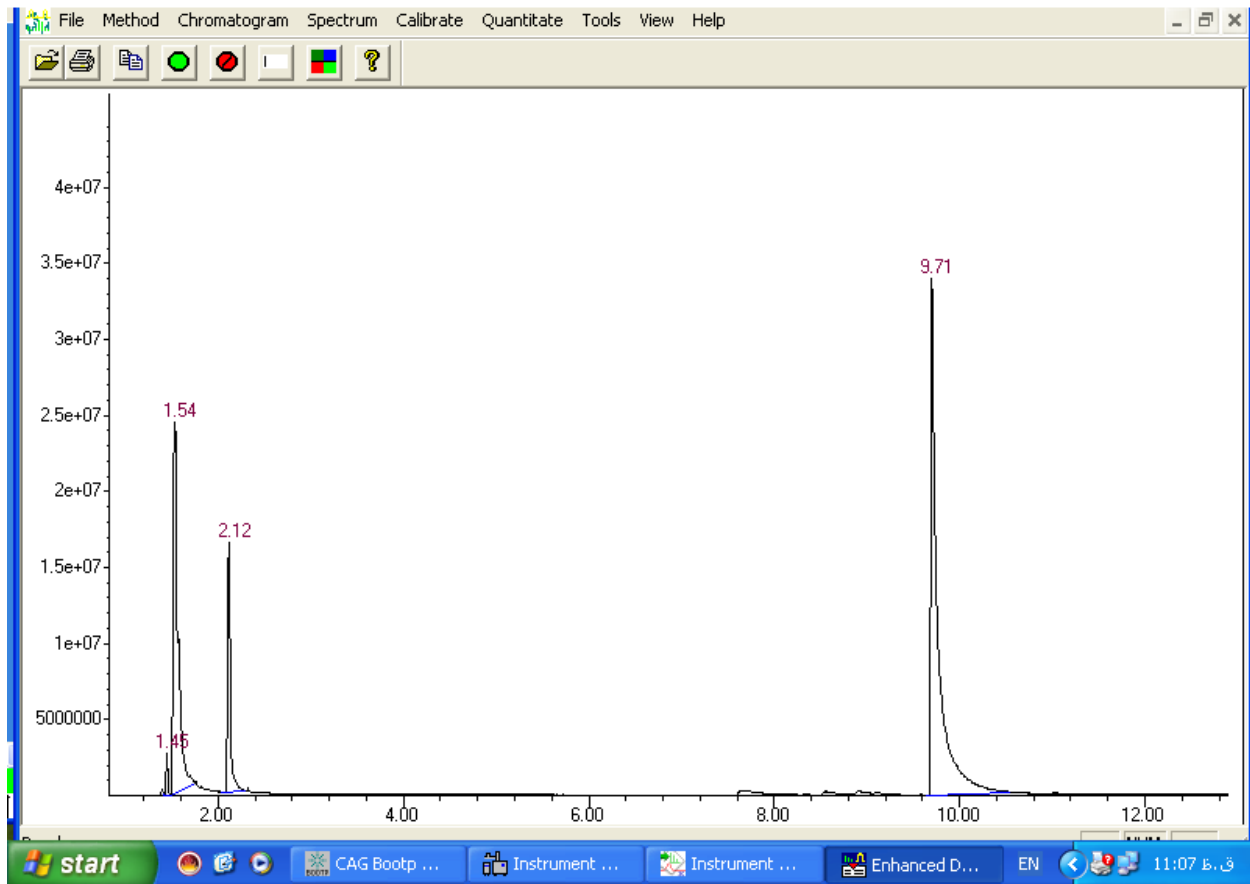

| Entry | retention time (min.) | Compound            |
|-------|-----------------------|---------------------|
| 1     | 1.54                  | Acetonitrile        |
| 2     | 2.12                  | Ditertbutylperoxide |
| 3     | 8.92                  | Fluorene            |
| 4     | 9.71                  | Fluorene-one        |

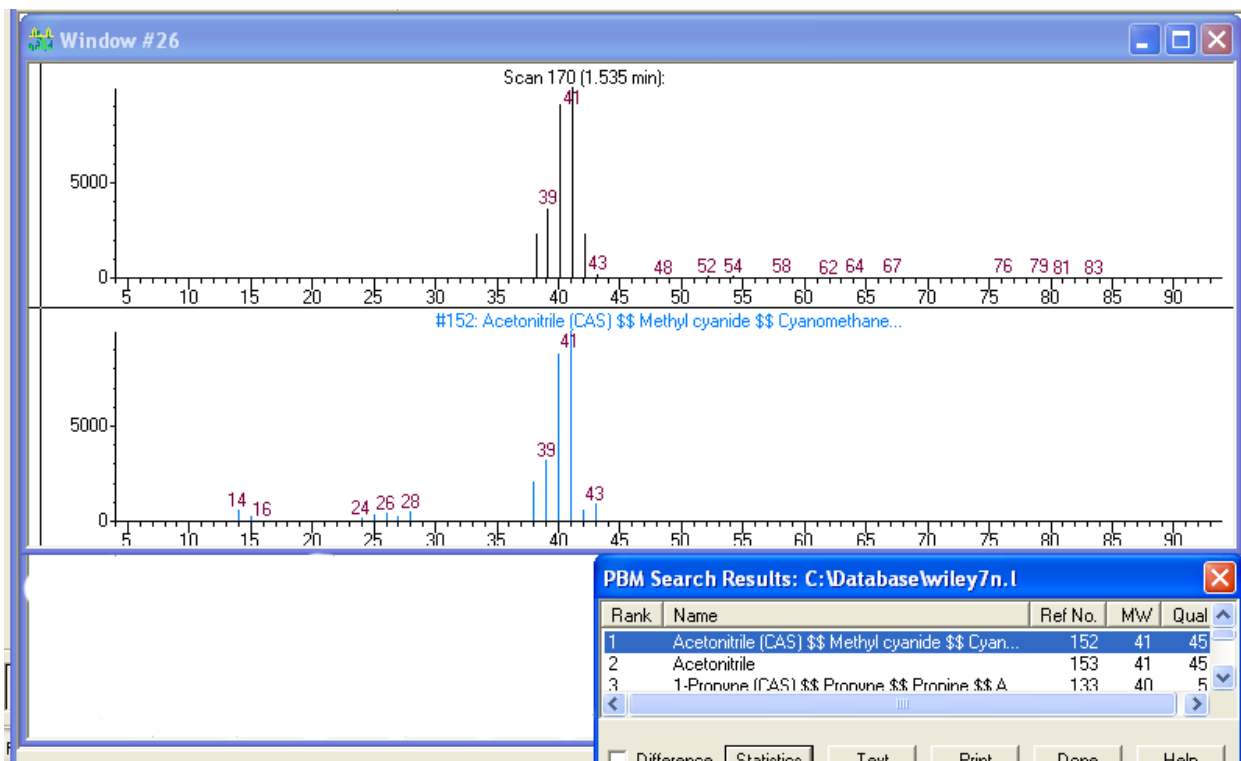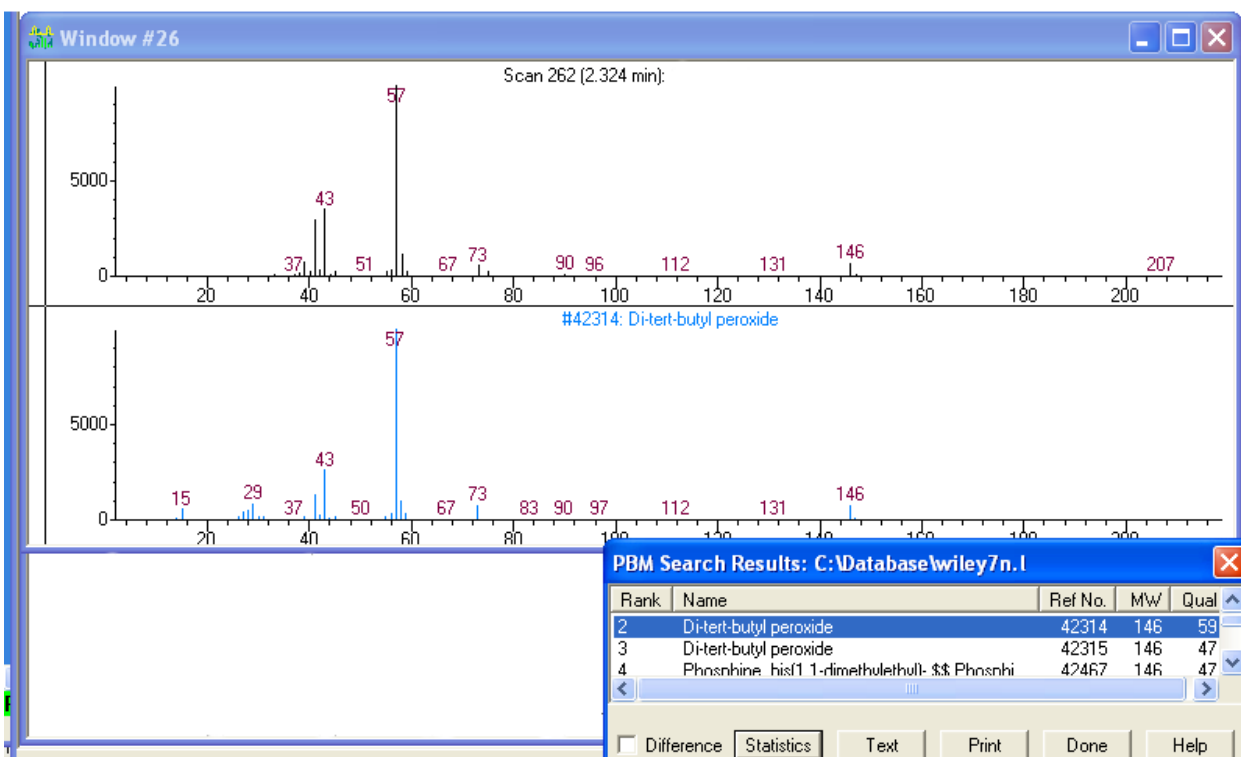

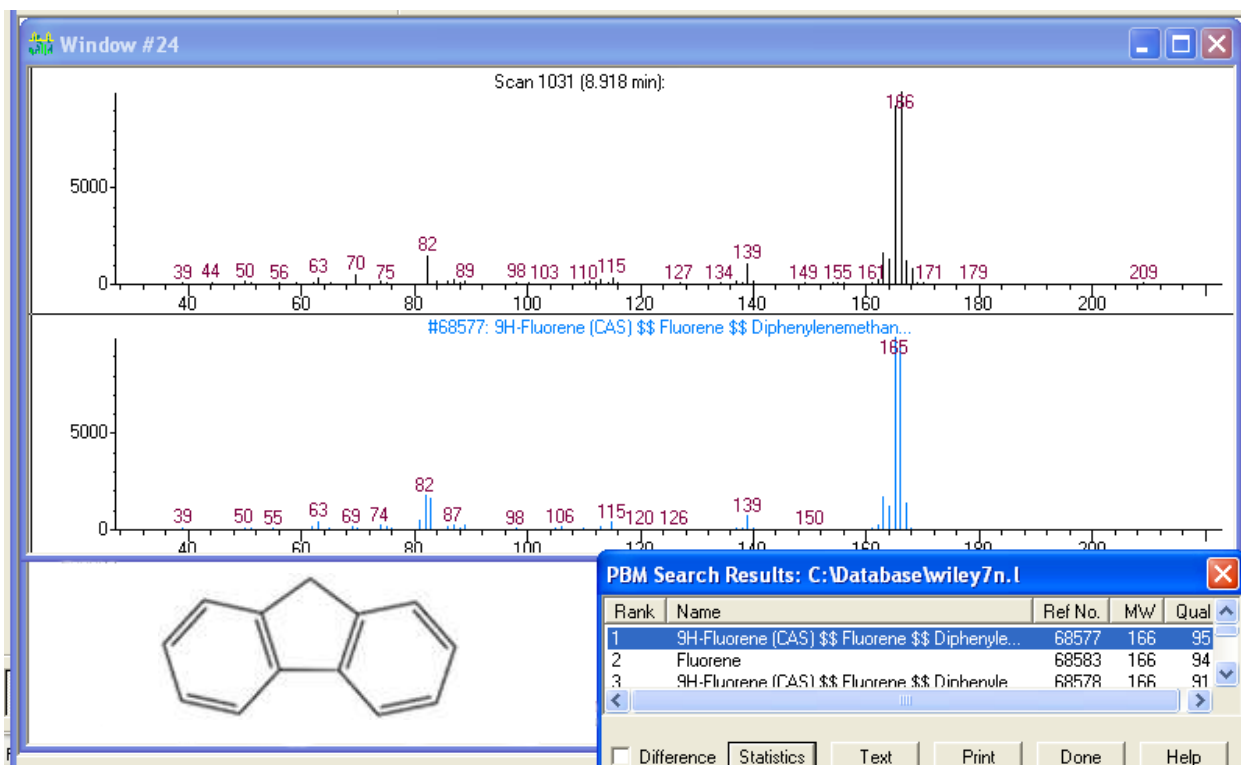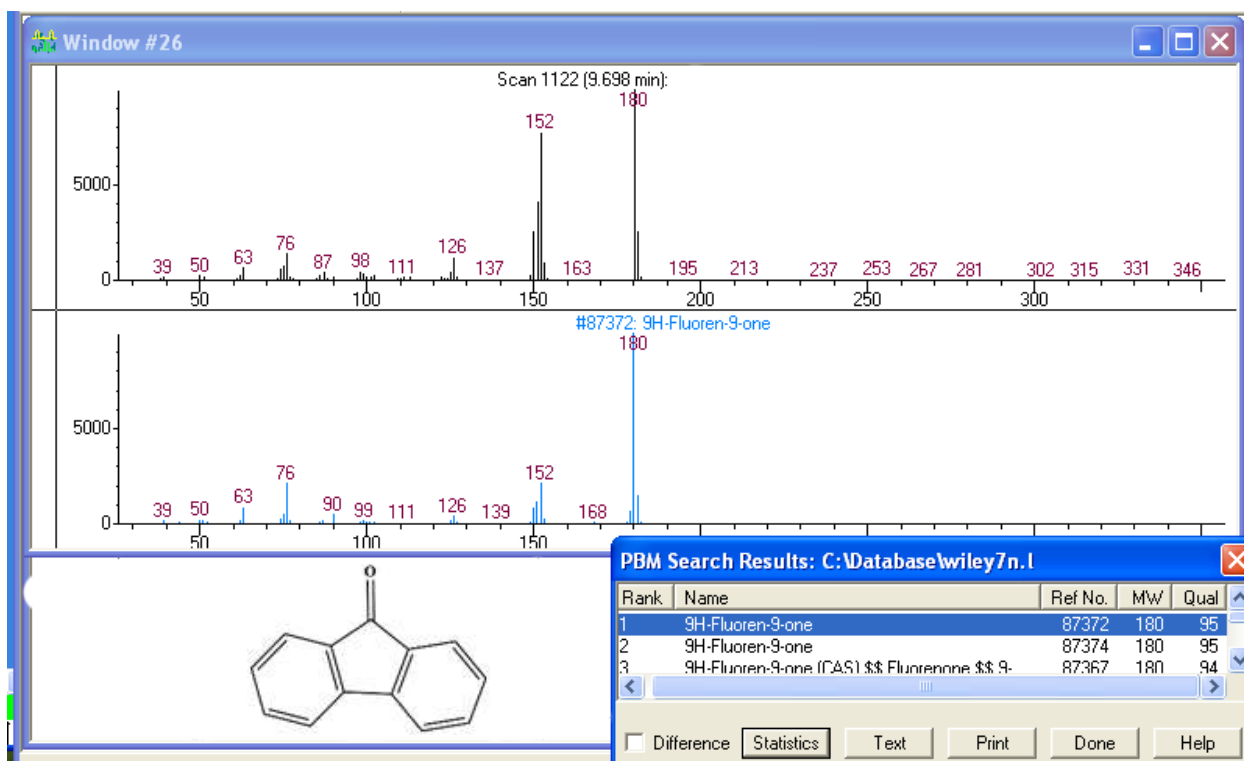

## 2. Diphenylmethane

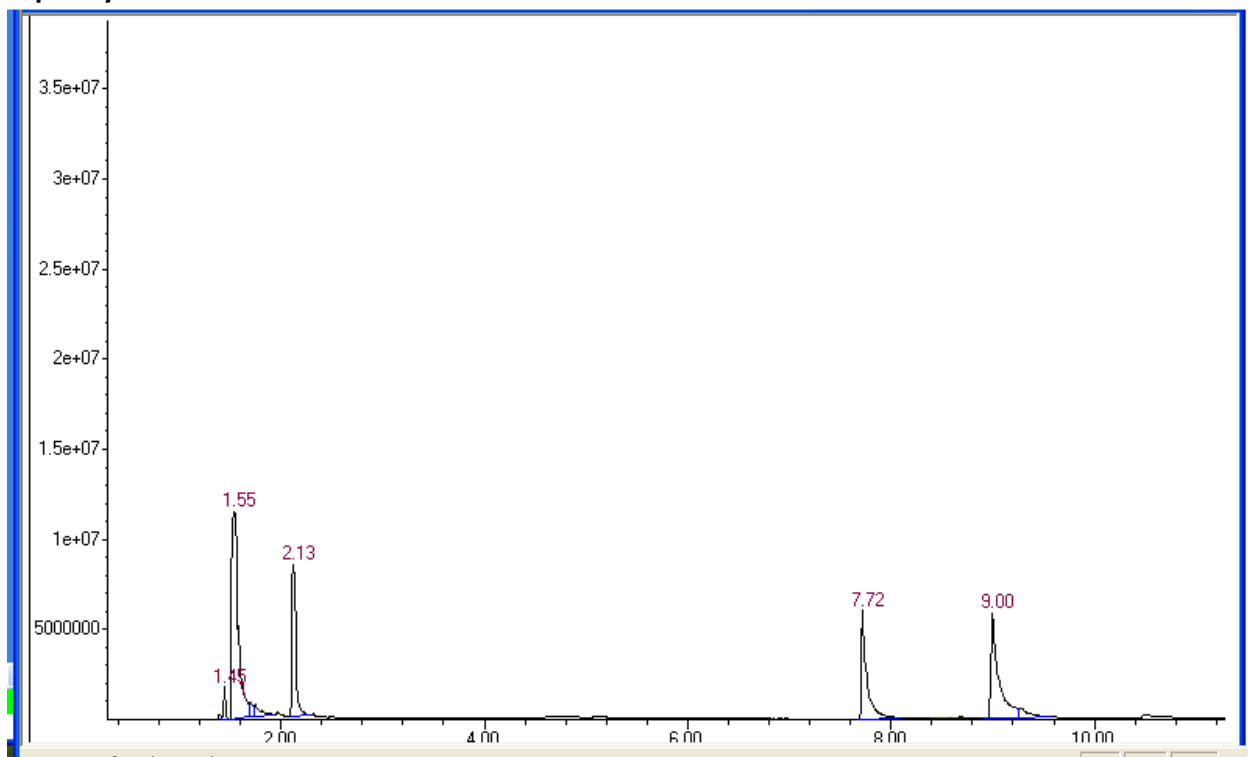

| Entry | retention time (min.) | Compound        |
|-------|-----------------------|-----------------|
| 1     | 7.72                  | Diphenylmethane |
| 2     | 9.00                  | Benzophenone    |

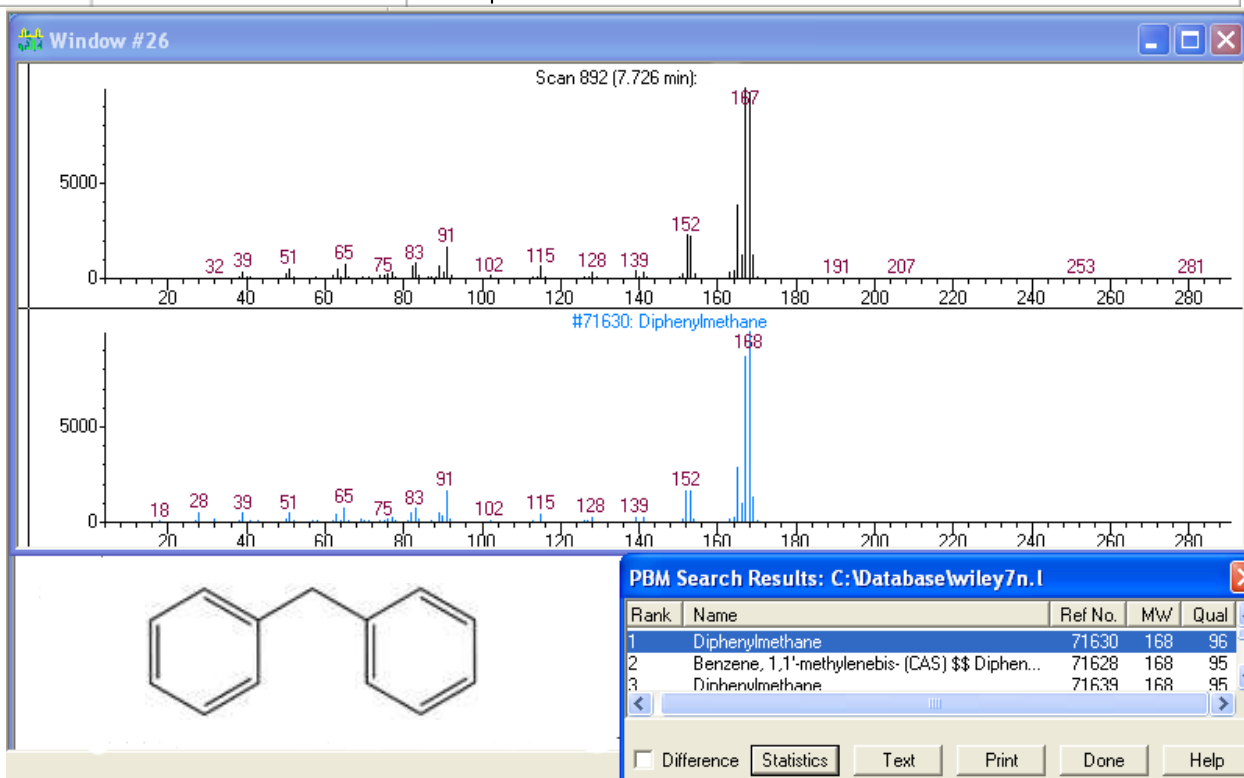

**PBM Search Results: C:\Database\wiley7n.l**

| Rank | Name                                             | Ref No. | MW  | Qual |
|------|--------------------------------------------------|---------|-----|------|
| 1    | Diphenylmethane                                  | 71630   | 168 | 96   |
| 2    | Benzene, 1,1'-methylenebis- (CAS) \$\$ Diphen... | 71628   | 168 | 95   |
| 3    | Dinhenulmethane                                  | 71639   | 168 | 95   |

Difference



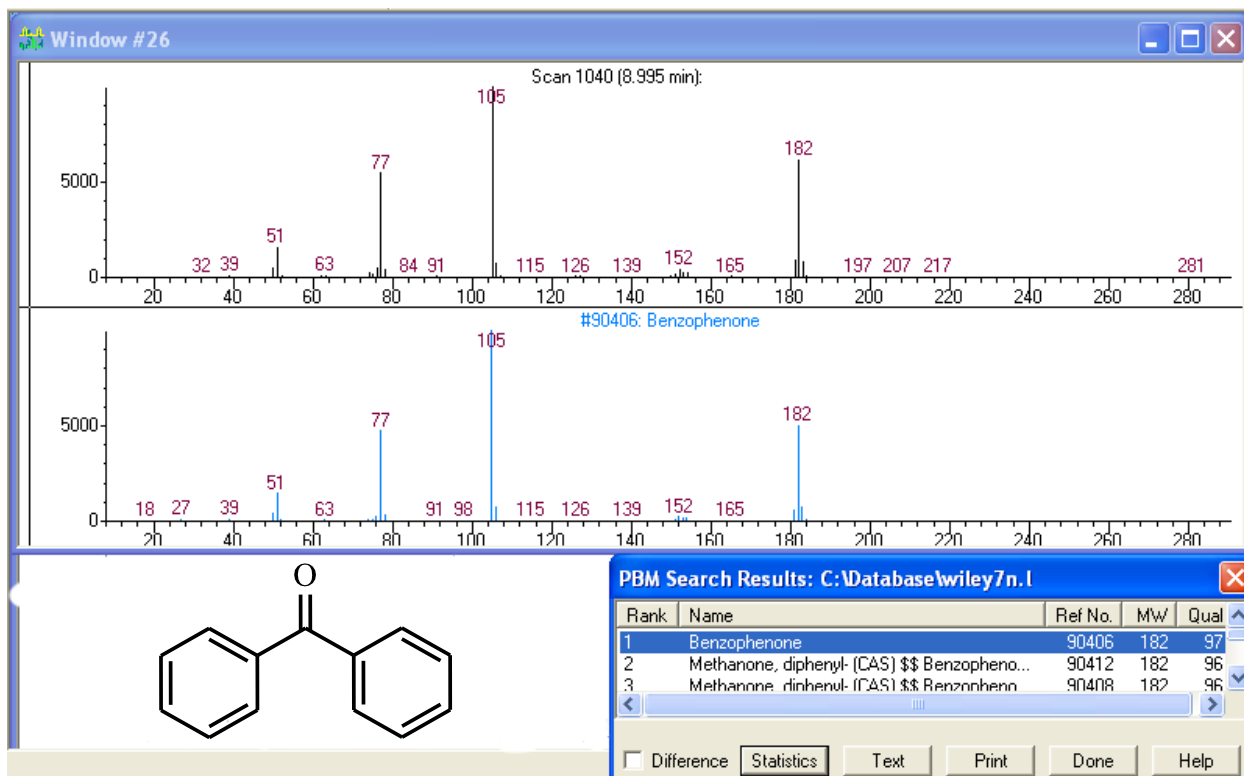

### 3. Ethyl benzene

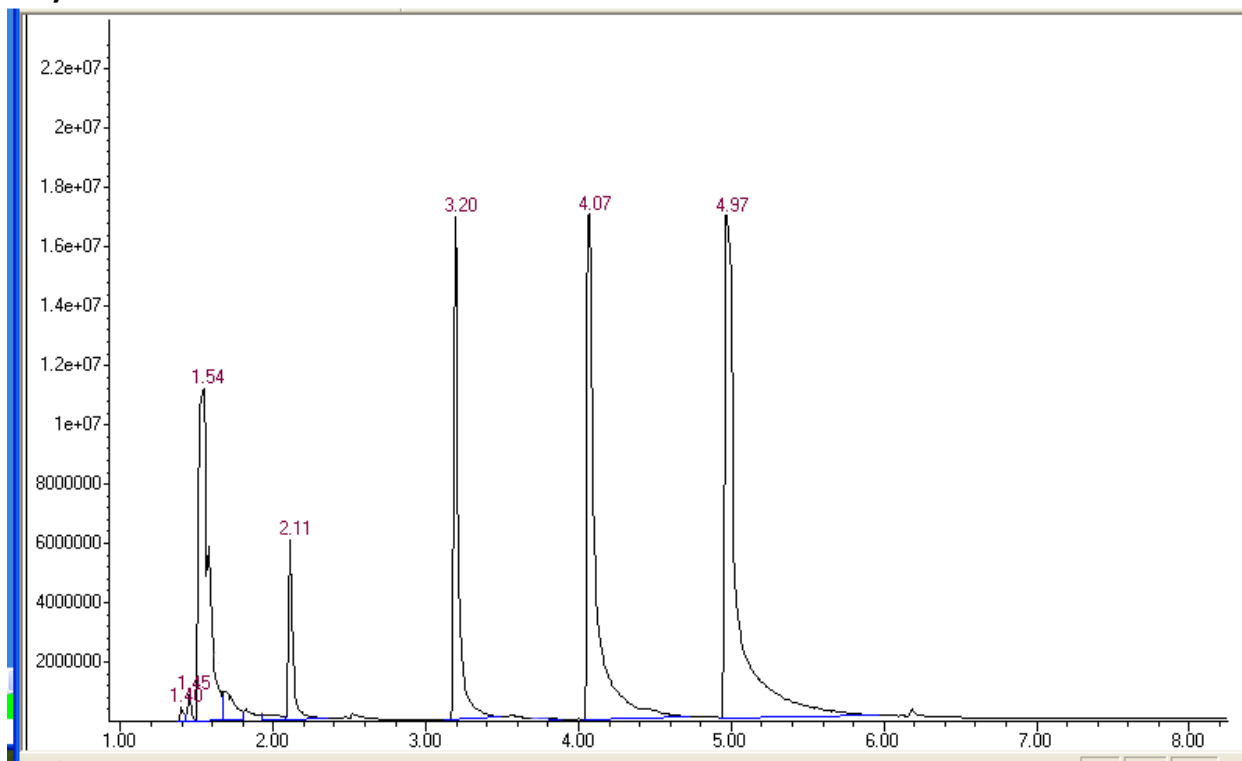

| Entry | retention time (min.) | Compound      |
|-------|-----------------------|---------------|
| 1     | 3.20                  | Ethyl benzene |
| 2     | 4.07                  | Benzaldehyde  |
| 3     | 4.97                  | Acetophenone  |

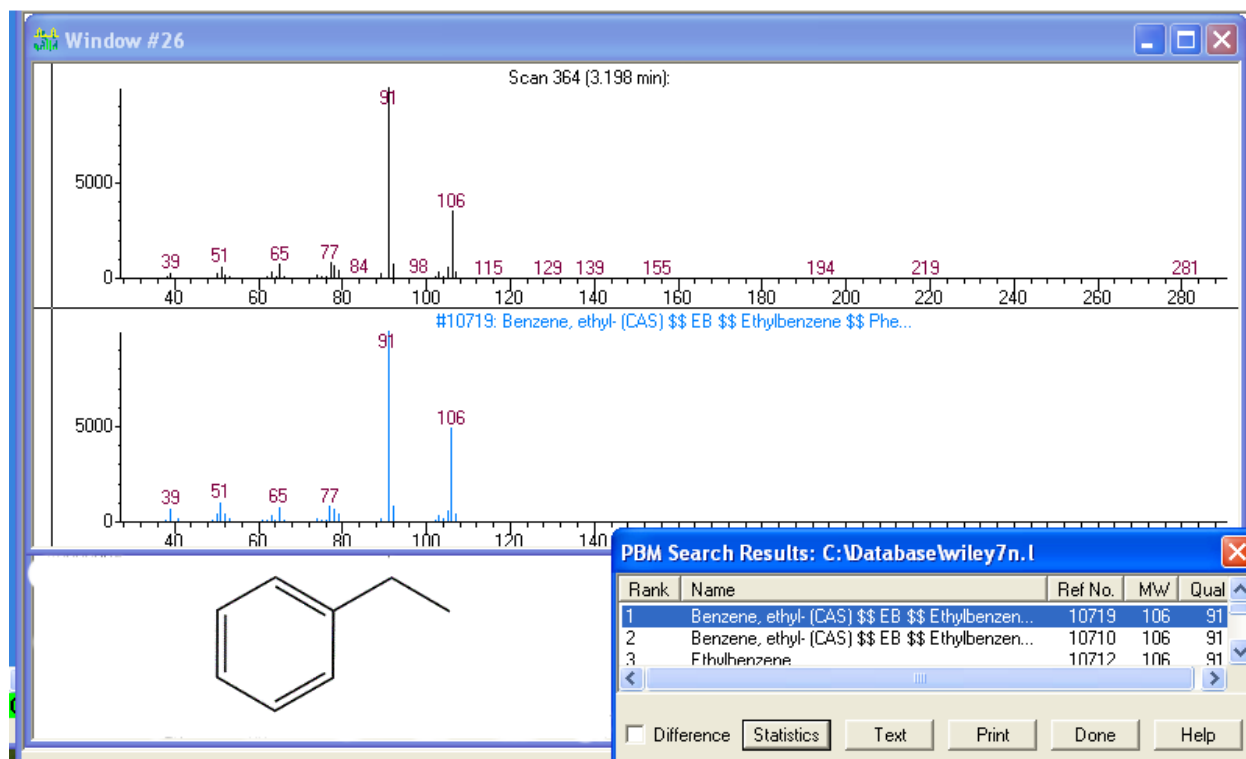

Window #26

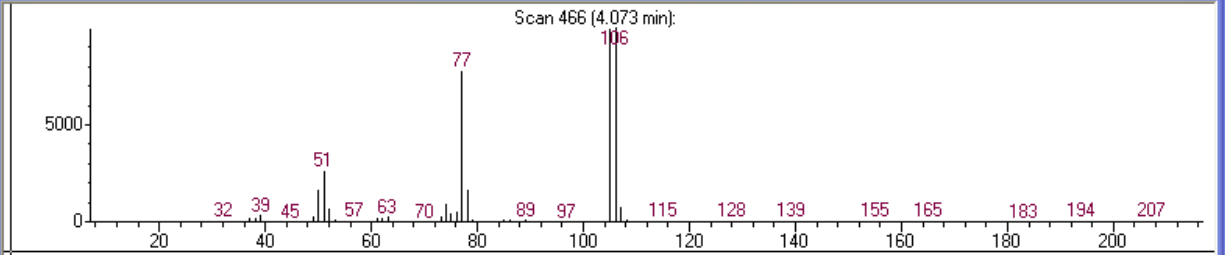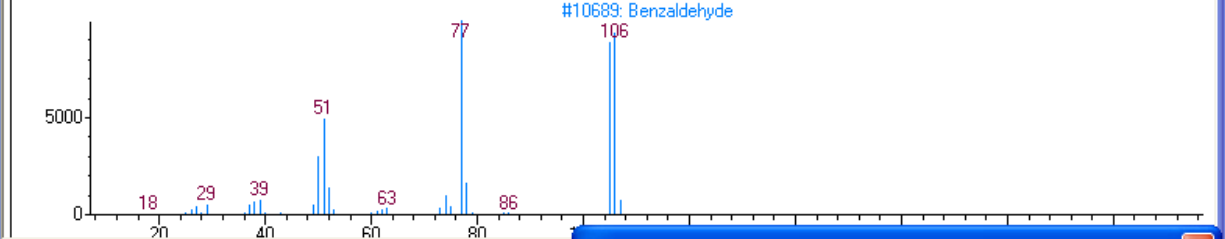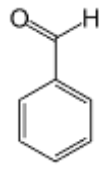

PBM Search Results: C:\Database\wiley7n.l

| Rank | Name                                            | Ref No. | MW  | Qual |
|------|-------------------------------------------------|---------|-----|------|
| 1    | Benzaldehyde                                    | 10689   | 106 | 96   |
| 2    | Benzaldehyde (CAS) \$\$ Phenylmethanal \$\$ ... | 10684   | 106 | 95   |
| 3    | Benzaldehyde (CAS) \$\$ Phenylmethanal \$\$     | 10693   | 106 | 94   |

Difference

#### 4. Cyclooctane

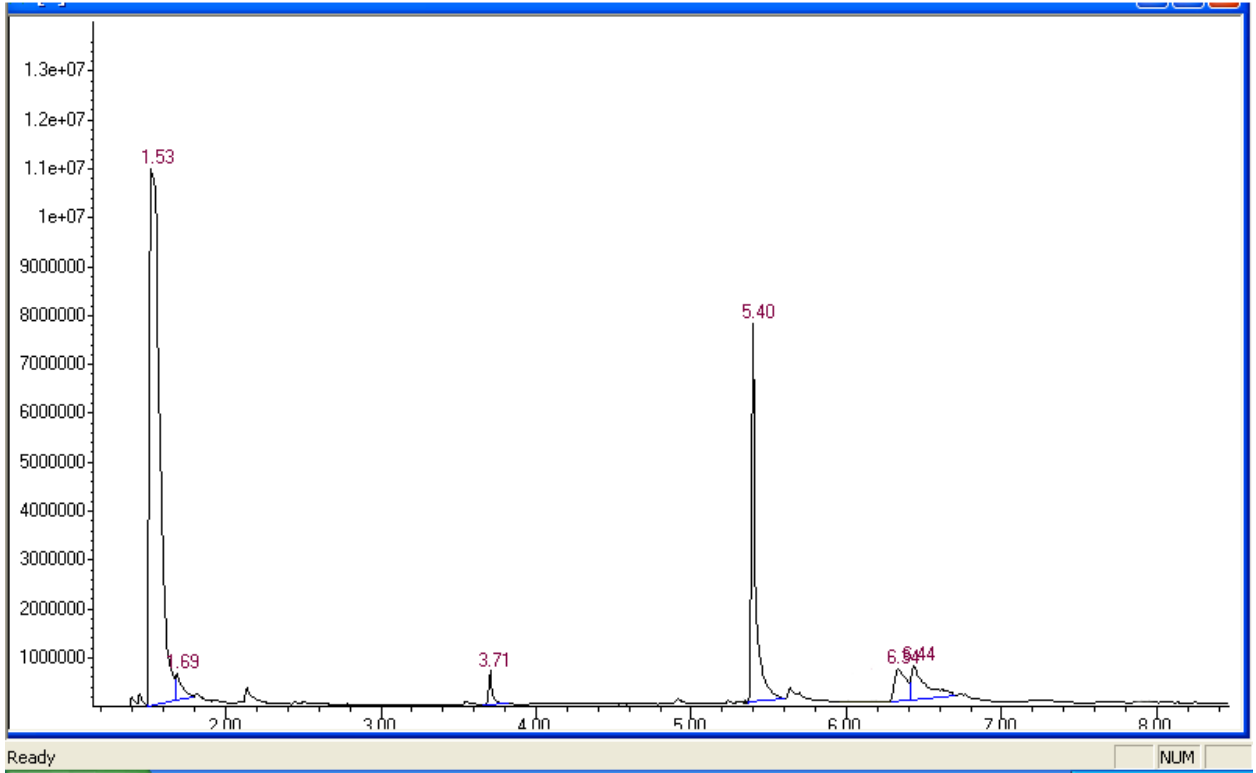

| Entry | retention time (min.) | Compound          |
|-------|-----------------------|-------------------|
| 1     | 3.71                  | Cyclooctane       |
| 2     | 5.40                  | Cyclooctanone     |
| 3     | 5.64                  | Cyclooctanol      |
| 4     | 6.440                 | Cyclooctane dione |

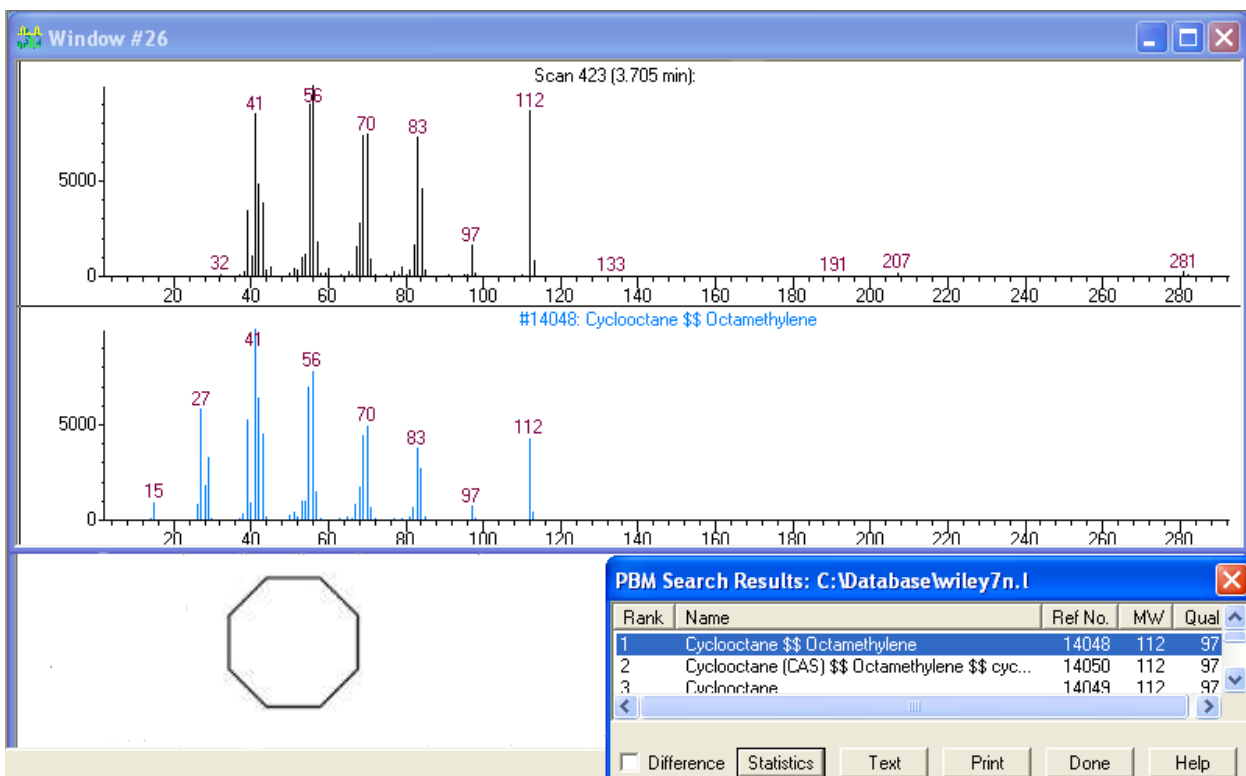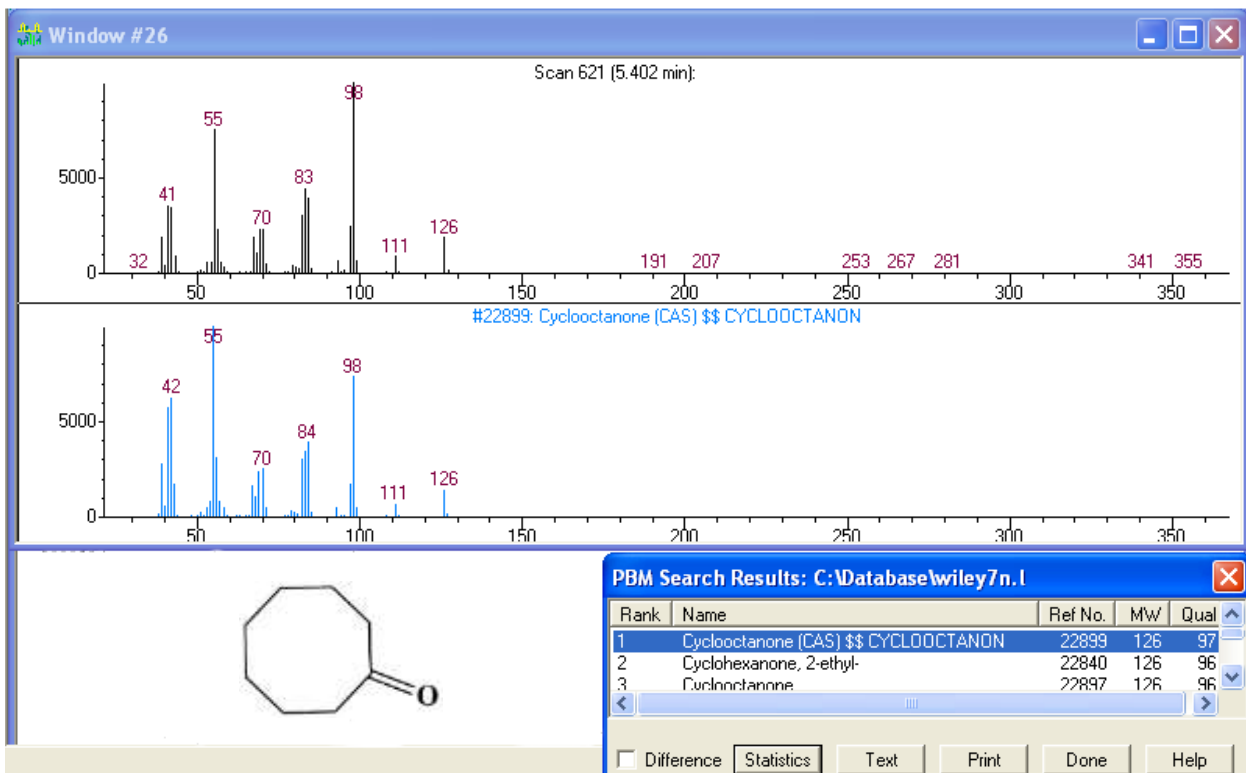

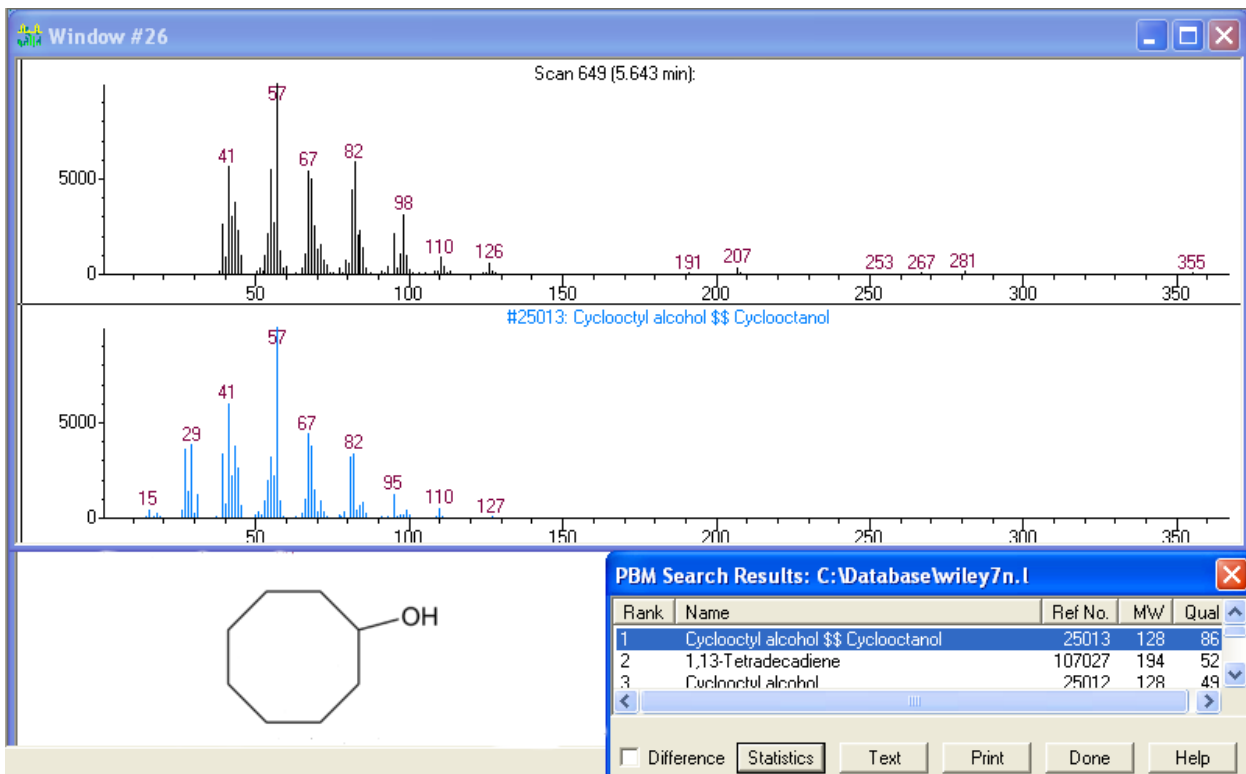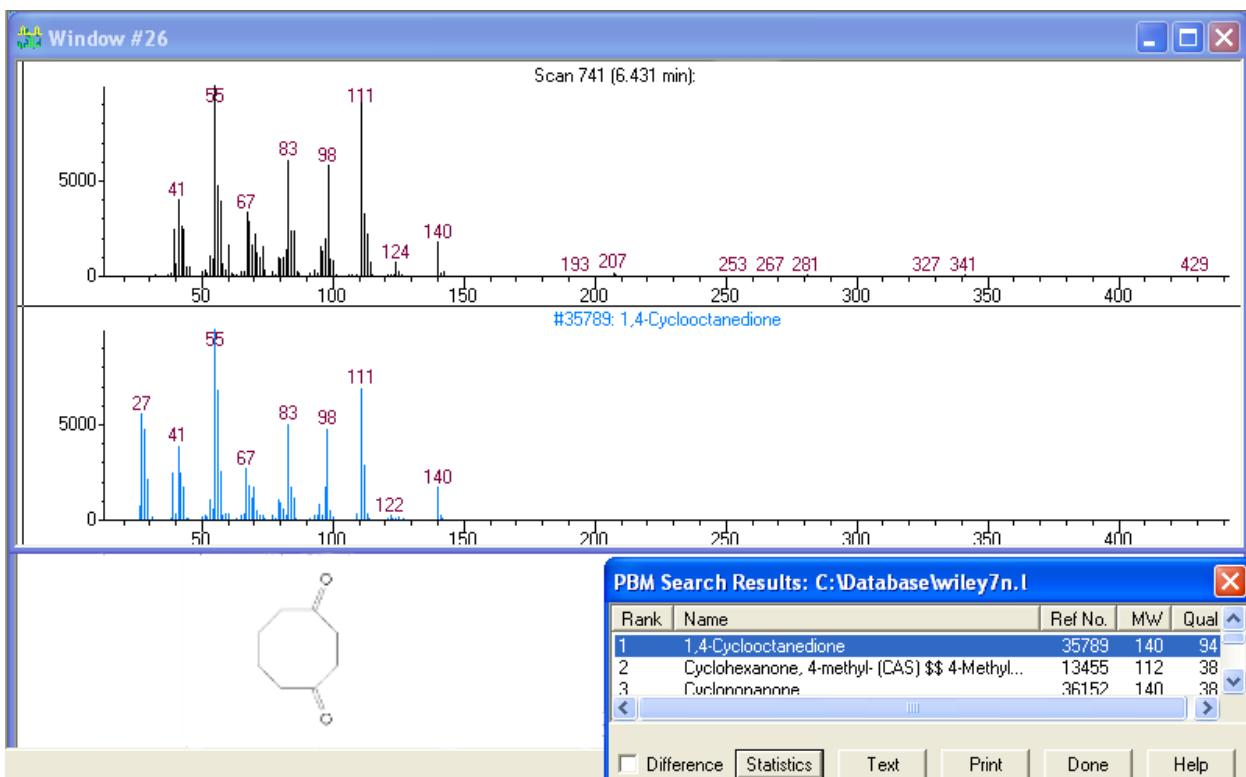

## 5. Adamantane

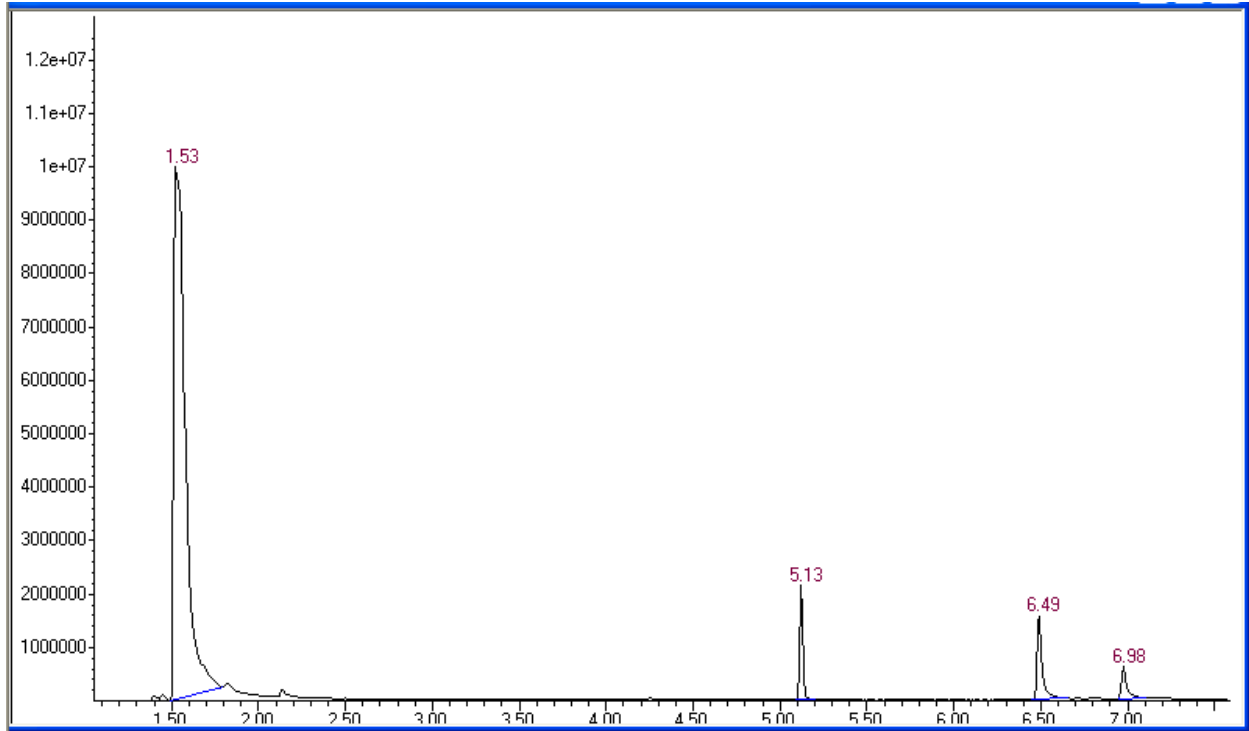

| Entry | retention time (min.) | Compound     |
|-------|-----------------------|--------------|
| 1     | 5.13                  | Adamantane   |
| 2     | 6.49                  | Adamantanol  |
| 3     | 6.98                  | Adamantanone |

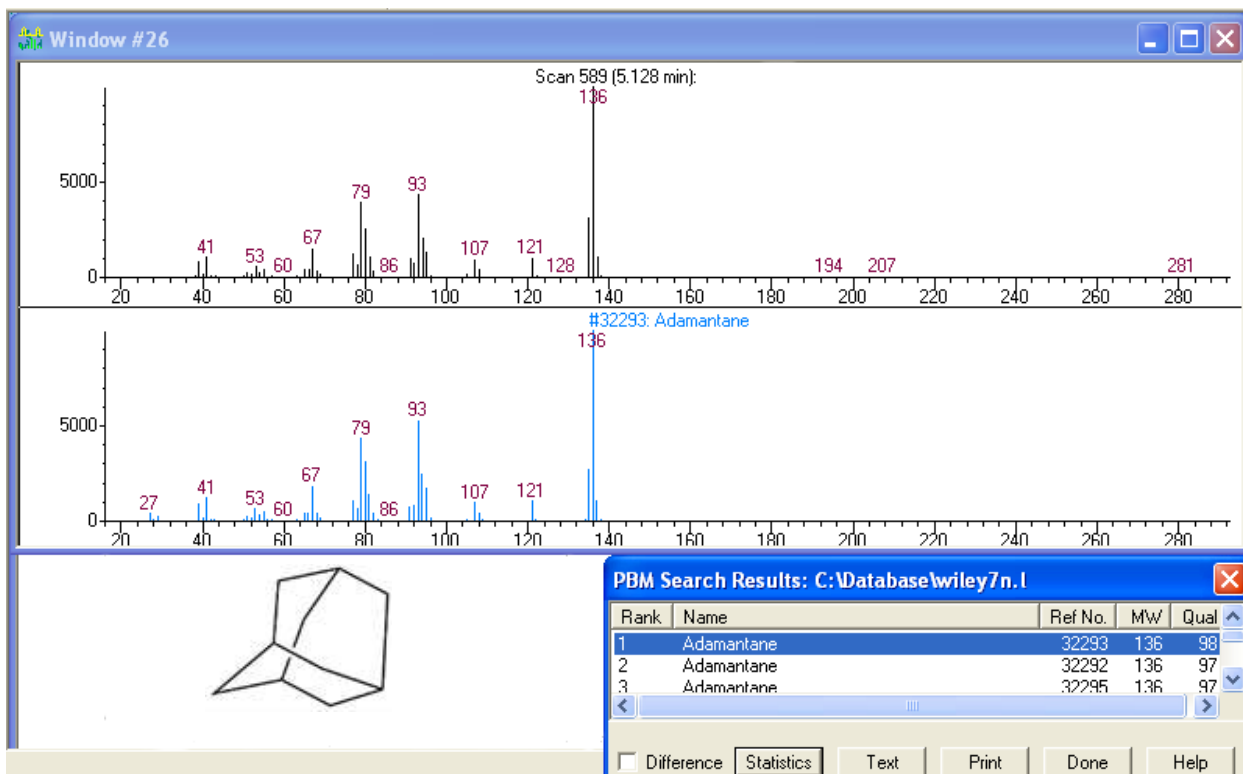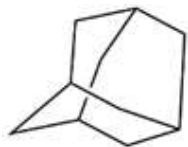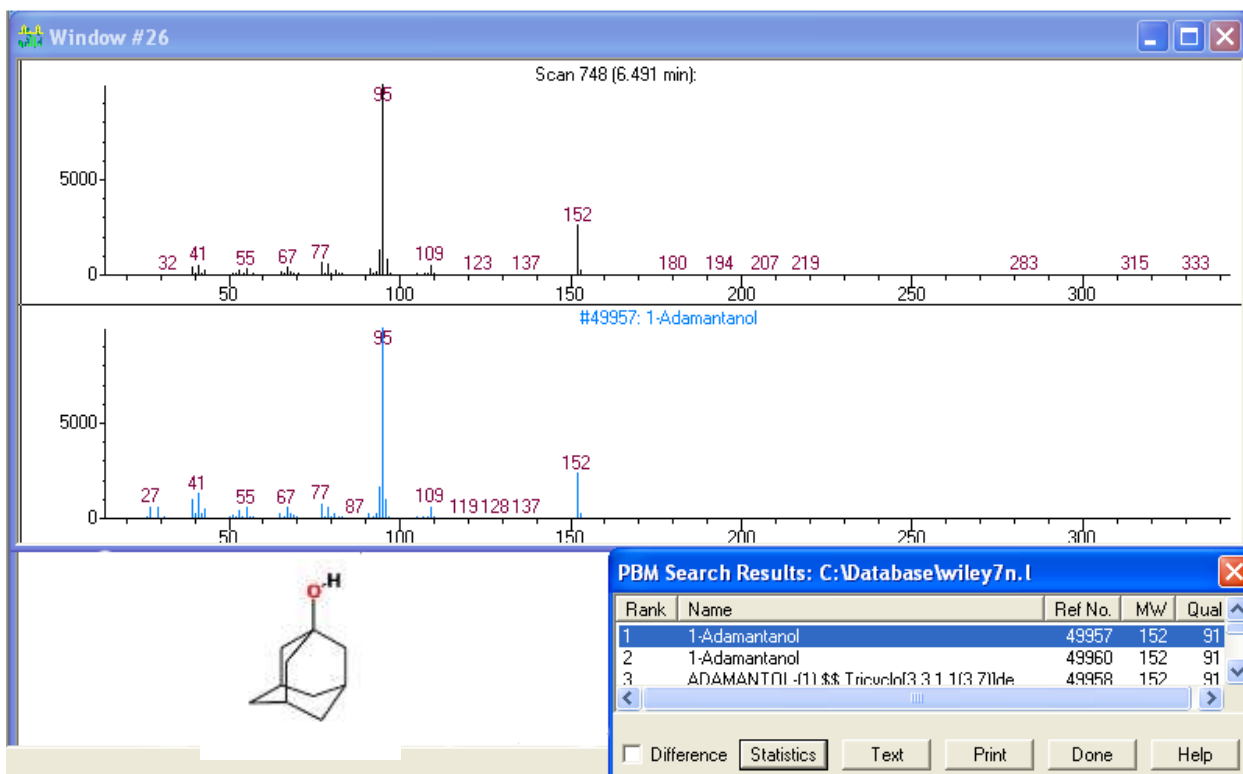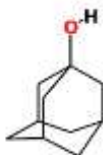



## How to calculate TON:

### Homogeneous catalyst

- 1) Catalyst A:  $[\text{Co}(\text{tptz})\text{Cl}_2] \cdot 2\text{H}_2\text{O}$  (MW.= 478.20)

1mmol Catalyst A ( $[\text{Co}(\text{tptz})\text{Cl}_2] \cdot 2\text{H}_2\text{O}$ ) = 1mmol Co(II) (active site)

So:

$$50 \text{ mg Catalyst A} = 0.104 \text{ mmol Catalyst A} = \mathbf{0.104 \text{ mmol Co(II)}}$$

- 2) for example: 1mmol of flourene substrate, conversion= 99%

**mmol of product= 0.99**

- 3)  $\text{TON} = \text{mmol of product} / \text{mmol of cobalt present in catalyst} = 0.99 / 0.104 = \mathbf{9.52}$

### Heterogeneous catalyst:

- 1)  $\text{Fe}_3\text{O}_4@\text{SiO}_2@\text{APTMS}@$ complex (catalyst B), **Co(II) content of catalyst B was 0.3%**

So:

$$70 \text{ mg Catalyst B} = 0.21 \text{ mg Co(II)} = \mathbf{3.56 \times 10^{-3} \text{ mmol Co(II)}}$$

- 2) for example: 1mmol of flourene substrate, conversion= 42%

**mmol of product= 0.42**

- 3)  $\text{TON} = \text{mmol of product} / \text{mmol of cobalt present in catalyst} = 0.42 / 3.56 \times 10^{-3} = \mathbf{118}$

## References

- [1] X. Liu, Z. Ma, J. Xing, H. Liu, J. Magn. Magn. Mater., 2004, **270**,1.
- [2] J. Wang, S. Zheng, Y. Shao, J. L. Liu, Z. Xu, D. Zhu, J. Colloid Interface Sci., 2010, **349**, 293.
- [3] S. Shylesh, W. R. Thiel, V. Schunemann, Angew. Chem. Int., 2010, **49**, 3428.
